# Supplementary material
Source: ML conference proceedings conference paper supplement (https://openreview.net/forum?id=alaQzRbCY9w)
Supplement: supplementary_material [file attachment]

## A APPENDIX

### A.1 PROOF OF THEOREM [1](#)

*Proof.* First we show that the SMB step for each parameter group  $p$  can be expressed a special quasi-Newton update. For brevity, let us use  $s_k$ ,  $s_k^t$ ,  $g_k$ ,  $g_k^t$ , and  $y_k$  instead of  $s_{k,p}$ ,  $s_{k,p}^t$ ,  $g_{k,p}$ ,  $g_{k,p}^t$ , and  $y_{k,p}$ , respectively. Recalling the definitions of  $\theta$  and  $\delta$  given in [5](#), observe that

$$2\delta = \|s_k^t\| \|y_k\| + \frac{1}{\eta} \|s_k^t\| \|g_k\| - y_k^\top s_k^t = \alpha_k \left( \|g_k\| \|y_k\| + \frac{1}{\eta} \|g_k\|^2 + y_k^\top g_k \right) = \alpha_k \sigma,$$

and

$$\theta = (y_k^\top s_k^t + 2\delta)^2 - \|s_k^t\|^2 \|y_k\|^2 = \alpha_k^2 (\sigma - y_k^\top g_k)^2 - \alpha_k^2 \|g_k\|^2 \|y_k\|^2 = \alpha_k^2 (\beta^2 - \|g_k\|^2 \|y_k\|^2) = \alpha_k^2 \gamma,$$

where

$$\sigma = \|g_k\| \|y_k\| + \frac{1}{\eta} \|g_k\|^2 + y_k^\top g_k, \quad \beta = \sigma - y_k^\top g_k, \quad \text{and} \quad \gamma = (\beta^2 - \|g_k\|^2 \|y_k\|^2).$$

Therefore, we have

$$\begin{aligned} c_g(\delta)g_k &= -\frac{\|s_k^t\|^2}{2\delta}g_k = -\frac{\alpha_k^2 \|g_k\|^2}{\alpha_k \sigma \gamma} \gamma g_k = -\alpha_k \frac{\|g_k\|^2}{\sigma \gamma} \gamma g_k, \\ c_y(\delta)y_k &= -\frac{\|s_k^t\|^2}{2\delta\theta} [-(y_k^\top s_k^t + 2\delta)(s_k^t)^\top g_k + \|s_k^t\|^2 y_k^\top g_k] y_k \\ &= -\frac{\|g_k\|^2}{\alpha_k \sigma \gamma} y_k [\alpha_k^2 (\sigma - y_k^\top g_k) g_k^\top g_k + \alpha_k^2 \|g_k\|^2 y_k^\top g_k] \\ &= -\alpha_k \frac{\|g_k\|^2}{\sigma \gamma} [\beta y_k g_k^\top + \|g_k\|^2 y_k y_k^\top] g_k, \end{aligned}$$

and

$$\begin{aligned} c_s(\delta)s_k^t &= -\frac{\|s_k^t\|^2}{2\delta\theta} [-(y_k^\top s_k^t + 2\delta)y_k^\top g_k + \|y_k\|^2 (s_k^t)^\top g_k] s_k^t \\ &= -\frac{\|g_k\|^2}{\alpha_k \sigma \gamma} (-\alpha_k) g_k [-\alpha_k (\sigma - y_k^\top g_k) y_k^\top g_k - \alpha_k \|y_k\|^2 g_k^\top g_k] \\ &= -\alpha_k \frac{\|g_k\|^2}{\sigma \gamma} [\beta g_k y_k^\top + \|y_k\|^2 g_k g_k^\top] g_k. \end{aligned}$$

Now, it is easy to see that

$$\begin{aligned} s_k &= c_g(\delta)g_k + c_y(\delta)y_k + c_s(\delta)s_k^t \\ &= -\alpha_k \frac{\|g_k\|^2}{\sigma \gamma} [\gamma I + \beta y_k g_k^\top + \|g_k\|^2 y_k y_k^\top + \beta g_k y_k^\top + \|y_k\|^2 g_k g_k^\top] g_k. \end{aligned}$$

Thus, for each parameter group  $p$ , we define

$$H_{k,p} = \frac{\|g_{k,p}\|^2}{\sigma_p \gamma_p} [\gamma_p I + \beta_p y_{k,p} g_{k,p}^\top + \|g_{k,p}\|^2 y_{k,p} y_{k,p}^\top + \beta_p g_{k,p} y_{k,p}^\top + \|y_{k,p}\|^2 g_{k,p} g_{k,p}^\top], \quad (9)$$

where

$$\sigma_p = \|g_{k,p}\| \|y_{k,p}\| + \frac{1}{\eta} \|g_{k,p}\|^2 + y_{k,p}^\top g_{k,p}, \quad \beta_p = \sigma_p - y_{k,p}^\top g_{k,p}, \quad \text{and} \quad \gamma_p = (\beta_p^2 - \|g_{k,p}\|^2 \|y_{k,p}\|^2).$$

Now, assuming that we have the parameter groups  $\{p_1, \dots, p_n\}$ , the SMB steps can be expressed as a quasi-Newton update given by

$$x_{k+1} = x_k - \alpha_k H_k g_k,$$

where

$$H_k = \begin{cases} I, & \text{if the Armijo condition is satisfied;} \\ \text{diag}(H_{k,p_1}, \dots, H_{k,p_n}), & \text{otherwise.} \end{cases}$$

Here,  $I$  denotes the identity matrix, and  $\text{diag}(H_{k,p_1}, \dots, H_{k,p_n})$  denotes the block diagonal matrix with the blocks  $H_{k,p_1}, \dots, H_{k,p_n}$ .

We next show that the eigenvalues of the matrices  $H_k$ ,  $k \geq 1$ , are bounded from above and below uniformly which is, of course, obvious when  $H_k = I$ . Using the Sherman-Morrison formula twice, one can see that for each parameter group  $p$ , the matrix  $H_{k,p}$  is indeed the inverse of the positive semidefinite matrix

$$B_{k,p} = \frac{1}{\|g_{k,p}\|^2} (\sigma_p I - g_{k,p} y_{k,p}^\top - y_{k,p} g_{k,p}^\top),$$

and hence, it is also positive semidefinite. Therefore, it is enough to show the boundedness of the eigenvalues of  $B_{k,p}$  uniformly on  $k$  and  $p$ .

Since  $g_{k,p} y_{k,p}^\top + y_{k,p} g_{k,p}^\top$  is a rank two matrix,  $\sigma_p / \|g_{k,p}\|^2$  is an eigenvalue of  $B_{k,p}$  with multiplicity  $n - 2$ . The remaining extreme eigenvalues are

$$\lambda_{\max}(B_{k,p}) = \frac{1}{\|g_{k,p}\|^2} (\sigma_p + \|g_{k,p}\| \|y_{k,p}\| - y_{k,p}^\top g_{k,p}) \quad \text{and} \quad \lambda_{\min}(B_{k,p}) = \frac{1}{\|g_{k,p}\|^2} (\sigma_p - \|g_{k,p}\| \|y_{k,p}\| - y_{k,p}^\top g_{k,p}),$$

with the corresponding eigenvectors  $\|y_{k,p}\| g_{k,p} + \|g_{k,p}\| y_{k,p}$  and  $\|y_{k,p}\| g_{k,p} - \|g_{k,p}\| y_{k,p}$ , respectively.

Observe that,

$$\begin{aligned} \lambda_{\min}(B_{k,p}) &= \frac{\sigma_p - \|g_{k,p}\| \|y_{k,p}\| - y_{k,p}^\top g_{k,p}}{\|g_{k,p}\|^2} \\ &= \frac{\|g_{k,p}\| \|y_{k,p}\| + \eta^{-1} \|g_{k,p}\|^2 + y_{k,p}^\top g_{k,p} - \|g_{k,p}\| \|y_{k,p}\| - y_{k,p}^\top g_{k,p}}{\|g_{k,p}\|^2} \\ &= \frac{\eta^{-1} \|g_{k,p}\|^2}{\|g_{k,p}\|^2} = \frac{1}{\eta} > 1. \end{aligned}$$

Thus, the smallest eigenvalue  $B_{k,p}$  is bounded away from zero uniformly on  $k$  and  $p$ .

Now, by our assumption of Lipschitz continuity of the gradients, for any  $x, y \in \mathbb{R}^n$  and  $\xi_k$ , we have

$$\|g(x, \xi_k) - g(y, \xi_k)\| \leq L \|x - y\|.$$

Thus, observing that  $\|y_{k,p}\| = \|g_{k,p}^t - g_{k,p}\| \leq L \|x_{k,p}^t - x_{k,p}\| \leq \alpha_k L \|g_{k,p}\|$ , we have

$$\begin{aligned} \lambda_{\max}(B_{k,p}) &= \frac{\sigma_p + \|g_{k,p}\| \|y_{k,p}\| - y_{k,p}^\top g_{k,p}}{\|g_{k,p}\|^2} \\ &= \frac{\|g_{k,p}\| \|y_{k,p}\| + \eta^{-1} \|g_{k,p}\|^2 + y_{k,p}^\top g_{k,p} + \|g_{k,p}\| \|y_{k,p}\| - y_{k,p}^\top g_{k,p}}{\|g_{k,p}\|^2} \\ &= \frac{2\|g_{k,p}\| \|y_{k,p}\| + \eta^{-1} \|g_{k,p}\|^2}{\|g_{k,p}\|^2} \leq 2L\alpha_k + \frac{1}{\eta} \leq 2L\alpha_{\max} + \eta^{-1}. \end{aligned}$$

This implies that the eigenvalues of  $H_{k,p} = B_{k,p}^{-1}$  are bounded below by  $1/(\eta^{-1} + 2L\alpha_{\max})$  and bounded above by 1 uniformly on  $k$  and  $p$ . This result, together with our assumptions, shows that steps of the SMBi algorithm satisfy the conditions of Theorem 2.10 in (Wang et al., 2017) with  $\underline{\kappa} = 1/(\eta^{-1} + 2L\alpha_{\max})$  and  $\bar{\kappa} = 1$  and Theorem 1 follows as a corollary.  $\square$
